# Supplementary material for: RGG-box in hnRNPA1 specifically recognizes the telomere G-quadruplex DNA and enhances the G-quadruplex unfolding ability of UP1 domain
Source: PubMed Central journal article supplement (PMC6212785; doi:10.1093/nar/gky854), 2018-09-22
Supplement: gky854_supplemental_files.pdf [file gky854_supplemental_files.pdf]

## SUPPLEMENTARY DATA

### **RGG-box in hnRNPA1 specifically recognizes the telomere G-quadruplex DNA and enhances the G-quadruplex unfolding ability of UP1 domain**

Meenakshi Ghosh<sup>1</sup> and Mahavir Singh<sup>1,2,\*</sup>

<sup>1</sup>Molecular Biophysics Unit, Indian Institute of Science, Bengaluru, 560012

<sup>2</sup>NMR Research Centre, Indian Institute of Science, Bengaluru, 560012

\* To whom correspondence should be addressed

Tel: +91 80 2293 2839; Fax: +91 80 2293 2839; Email: singh@iisc.ac.in

#### **Overview:**

**SI Figure 1.** Purification of the proteins used in this study.

**SI Figure 2.** Strip plots showing NMR resonance assignment of the residues present in the RGG-box.

**SI Figure 3.** Identification of the phenylalanine and tyrosine residues from selectively <sup>15</sup>N unlabeled sample of the RGG-box.

**SI Figure 4.** Structural characterization of DNA sequences by CD spectroscopy.

**SI Figure 5.** Imino region of 1D <sup>1</sup>H NMR spectra of DNA used in this study.

**SI Figure 6.** Arginine residue R#1 undergoes weak chemical shift perturbation upon binding to Tel22 and Tel12.

**SI Figure 7.** A subset of unassigned residues of the RGG-box that show specific fast exchange chemical shift perturbations upon addition of Tel22DNA.

**SI Figure 8.** Titration of K<sup>+</sup> form of Tel22 with UP1 and UP1+RGG and monitored through NMR.

**SI Figure 9.** Unfolding of the 5'-FAM and 3'-TAMRA labeled Na<sup>+</sup> form of Tel22 (5'-FAM-Tel22-TAMRA3') by UP1 and UP1+RGG monitored by observing the emission of FAM at 516 nM.

**SI Table S1.** Individual fit dissociation constants (K<sub>d</sub>) values determined for residues of the RGG-box for its interaction with Tel22 G-quadruplex DNA.

**Figure S1**

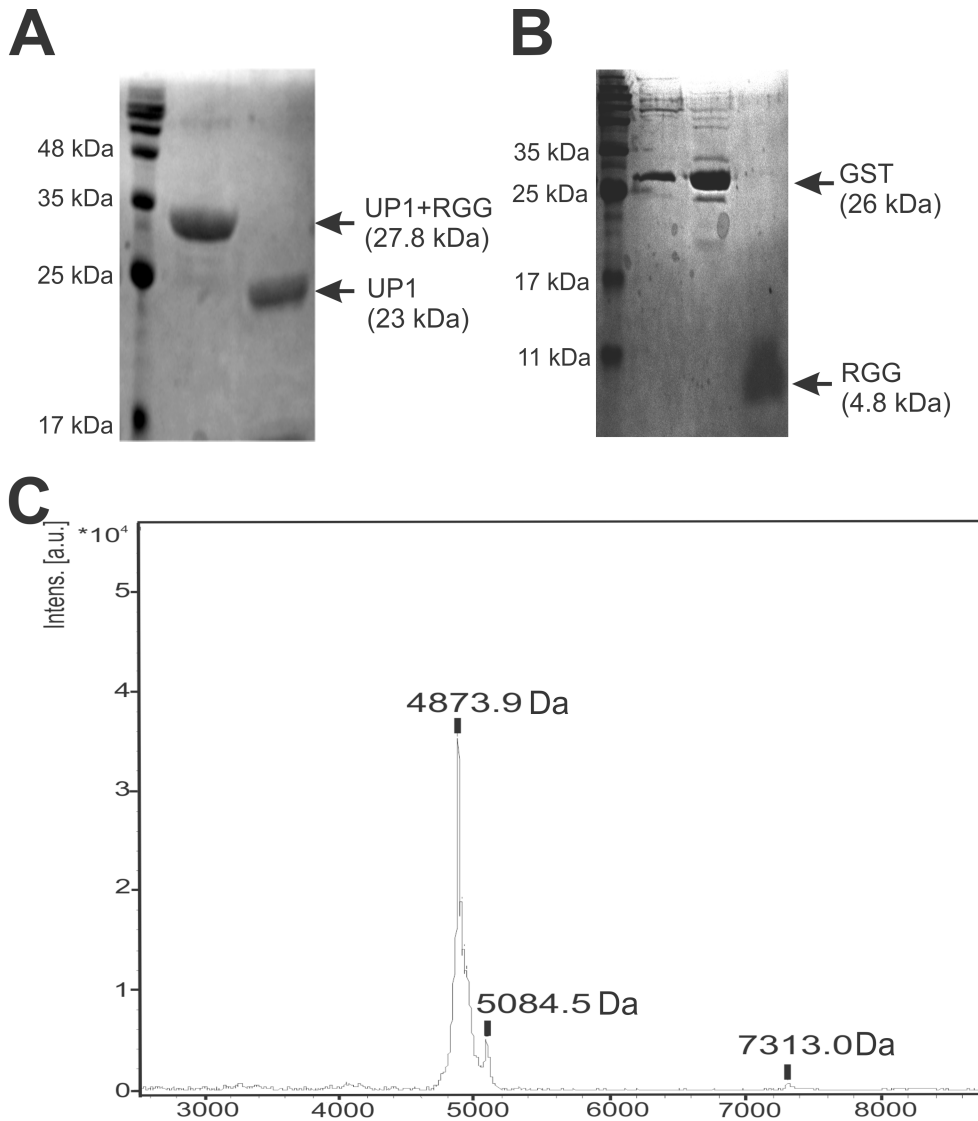

**SI Figure 1.** Purification of the proteins used in this study. **(A)** SDS PAGE showing purified UP1 and UP1+RGG proteins. **(B)** SDS PAGE of purified RGG-box after removal of GST-tag and size exclusion chromatography. **(C)** The mass of the RGG-box was further confirmed by MALDI –TOF MS analysis.

Figure S2

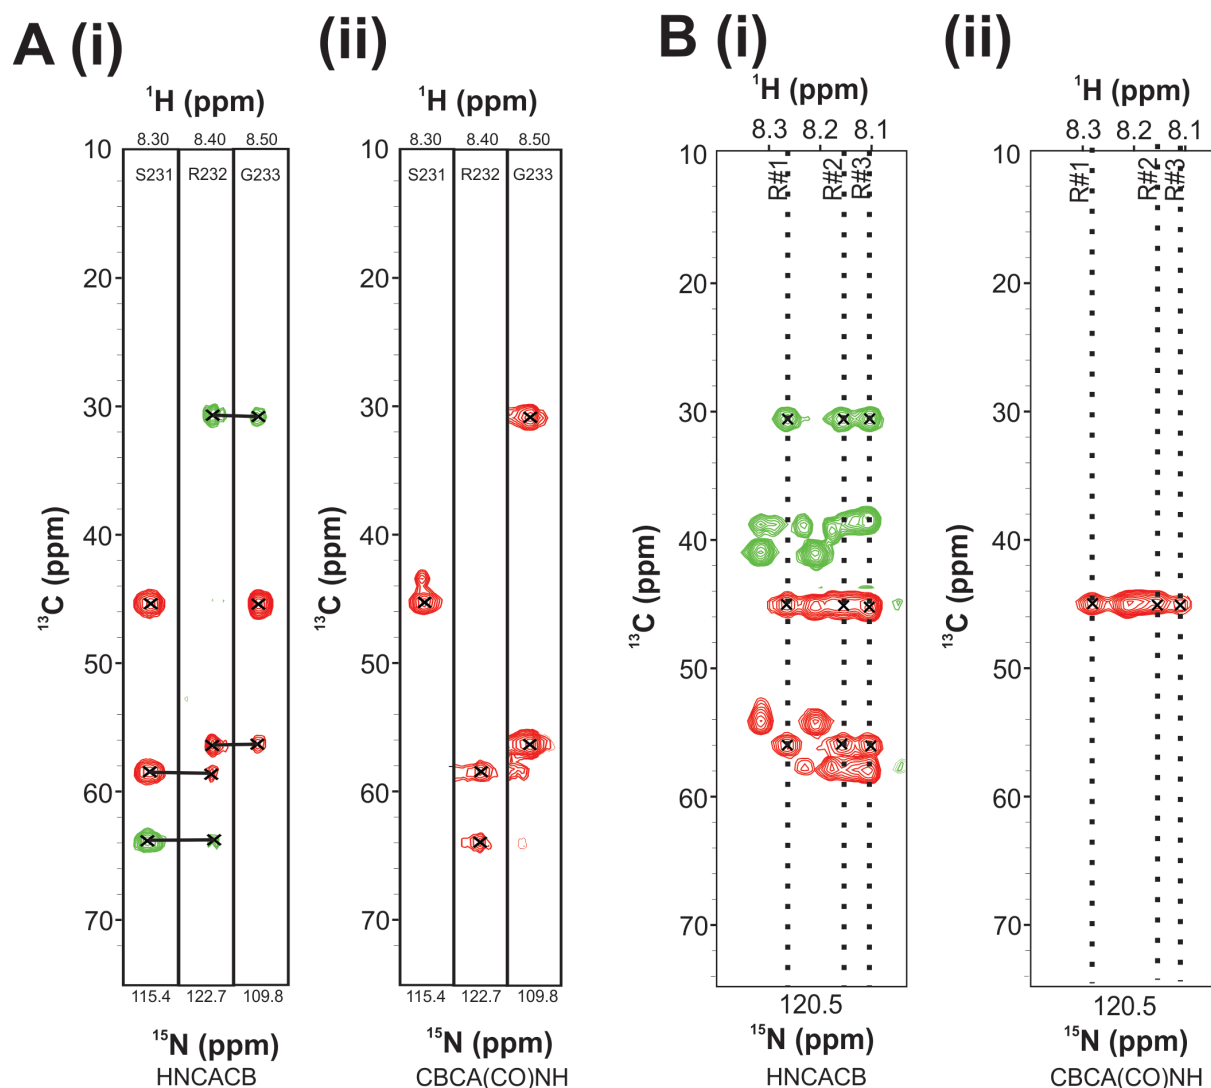

**SI Figure 2.** Strip plots showing NMR resonance assignment of the residues present in the RGG-box. **(A) (i)** HNCACB and **(ii)** CBCA(CO)NH strip plots showing sequential assignment of S231, R232, and G233 residues of the RGG-box. **(B i, ii)** The peaks pertaining to the arginine residues could be identified based on the chemical shift values for the residues and by the presence of the preceding glycine residues in HNCACB/CBCA(CO)NH spectra.

Figure S3

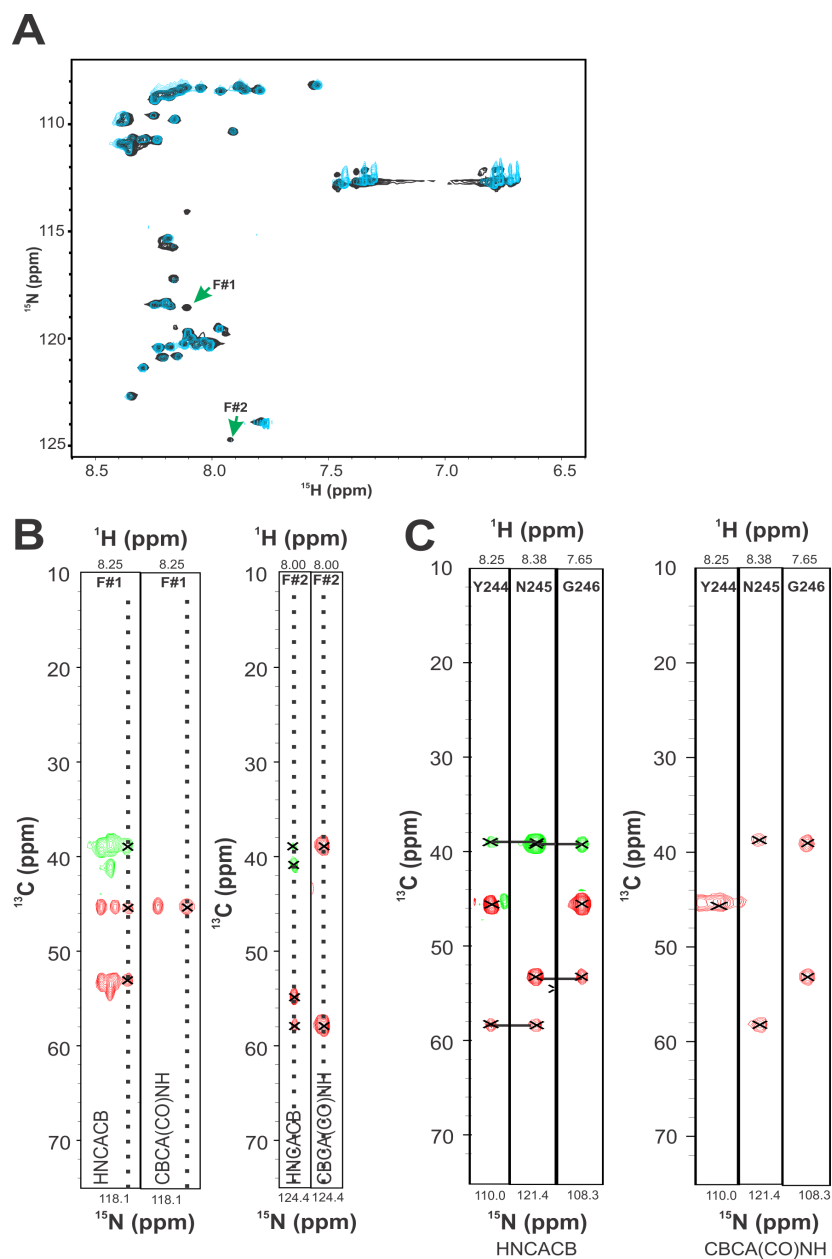

**SI Figure 3.** Identification of the phenylalanine and tyrosine residues from selectively  $^{15}\text{N}$  unlabeled sample of the RGG-box. **(A)**  $^{15}\text{N}$  - $^1\text{H}$  HSQC spectra of selectively Phe unlabeled  $^{15}\text{N}$  RGG-box spectra overlaid on  $^{15}\text{N}$ - $^1\text{H}$  HSQC spectra of  $^{15}\text{N}$  uniformly labeled RGG-box. **(B)** HNCACB and CBCA(CO)NH strip plots of identified Phe residues (F#1 and F#2). **(C)** HNCACB and CBCA(CO)NH strip plots showing the assignment of Y244, N245, G246 residues of the RGG-box.

**Figure S4**

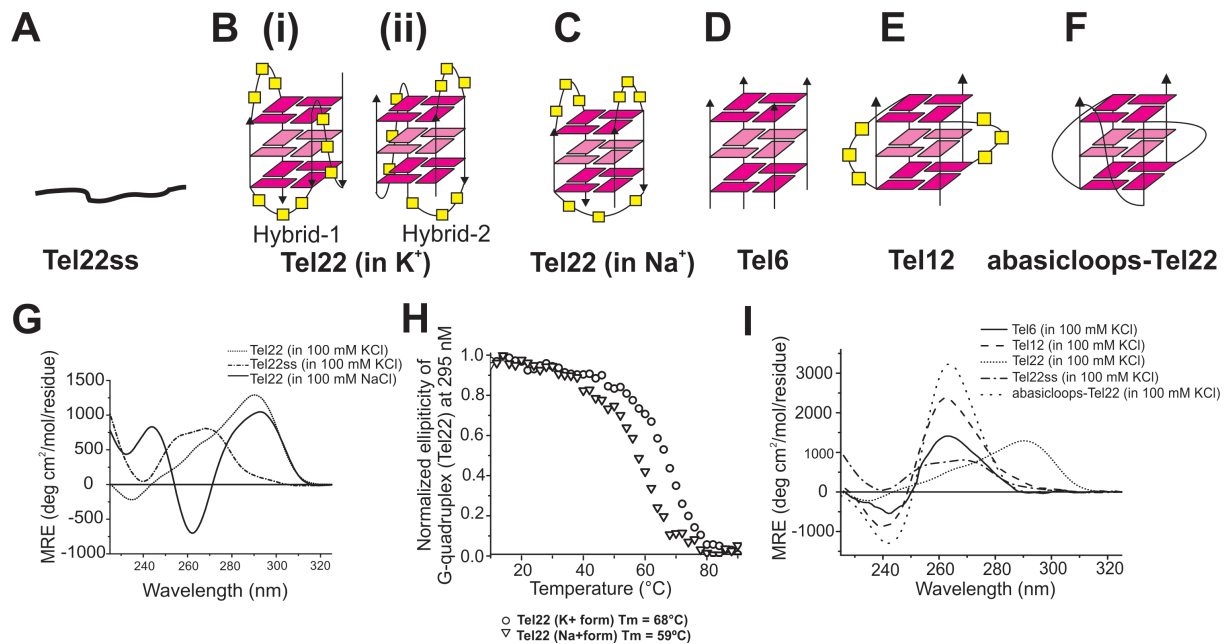

**SI Figure 4.** Structural characterization of DNA sequences by CD spectroscopy. **(A-F)** Cartoon representation of single stranded Tel22ss **(A)**, Tel22 intramolecular G-quadruplex in KCl **(B (i) and (ii))**, Tel22 intramolecular G-quadruplex in NaCl **(C)**, Tel6 tetrameric G-quadruplex in KCl **(D)**, Tel12dimeric G-quadruplex in KCl **(E)**, and abasicloops-Tel22 intramolecular G-quadruplex in KCl **(F)**. **(G)** CD spectra of Tel22ss and Tel22 in the presence of 100 mM NaCl and KCl. The Na<sup>+</sup> form of Tel22 shows positive peaks at 295 nm and 245 nm and a negative peak at 265 nm. The K<sup>+</sup> form of Tel22 shows maxima at 295 nm. Tel22ss does not show any of the characteristic peaks of G-quadruplex formation in either NaCl or KCl. **(H)** CD melting curve of Na<sup>+</sup> and K<sup>+</sup> for of Tel22 G-quadruplex monitored at 295 nm by CD spectroscopy. The melting temperature, T<sub>m</sub> deduced for both the forms are mentioned. **(I)** CD spectra of Tel22ss and quadruplexes formed by Tel6, Tel12, Tel22 and abasicloops-Tel22 in 100 mM KCl. Tel22 spectrum is characterized by a positive maxima at 295 nm. K<sup>+</sup> form of Tel6, Tel12 and abasicloops-Tel22 spectra are characterized by positive ellipticity at 260 nm and minima at 240 nm. The spectrum of single stranded Tel22ss is also shown.

**Figure S5**

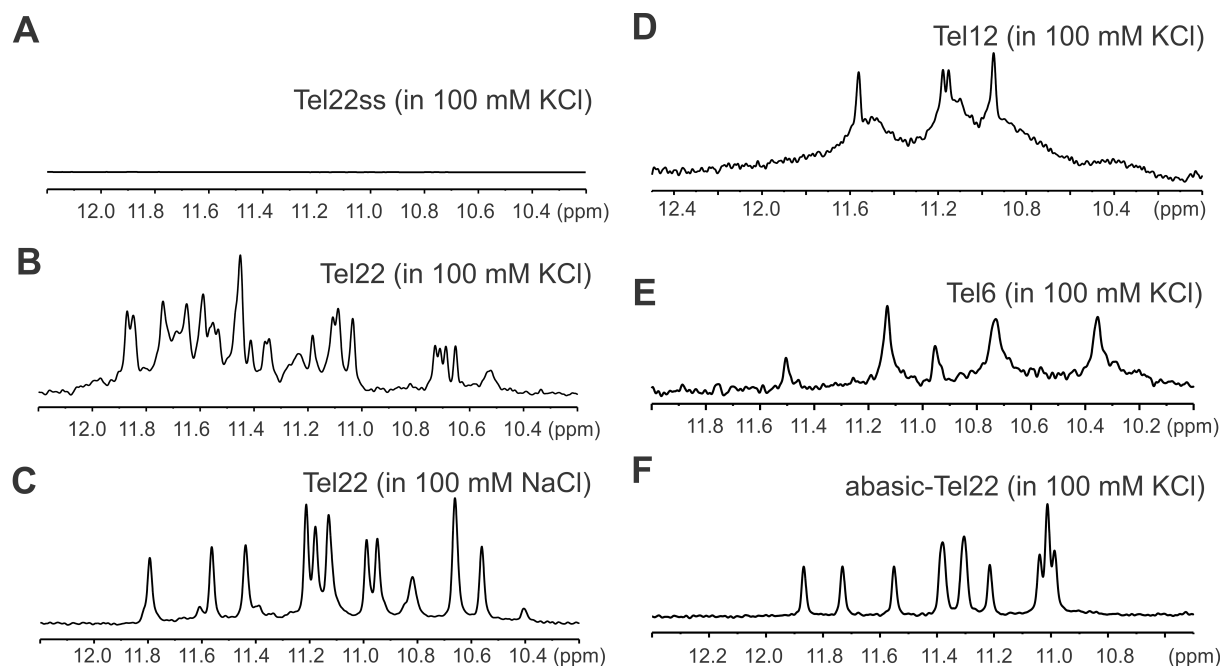

**SI Figure 5.** Imino region of 1D  $^1\text{H}$  NMR spectra of DNA used in this study. **(A)** Tel22ss does not show any peak in the imino region, which reinstates the fact that it does not form base-pairs and remains in single stranded conformation. **(B-F)** The imino peaks of G-quadruplex formed by Tel22 in 100 mM KCl **(B)**, Tel22 in 100 mM NaCl **(C)**, Tel12 in 100 mM KCl **(D)**, Tel6 in 100 mM KCl **(E)** and abasicloops-Tel22 in 100 mM KCl **(F)**.

Figure S6

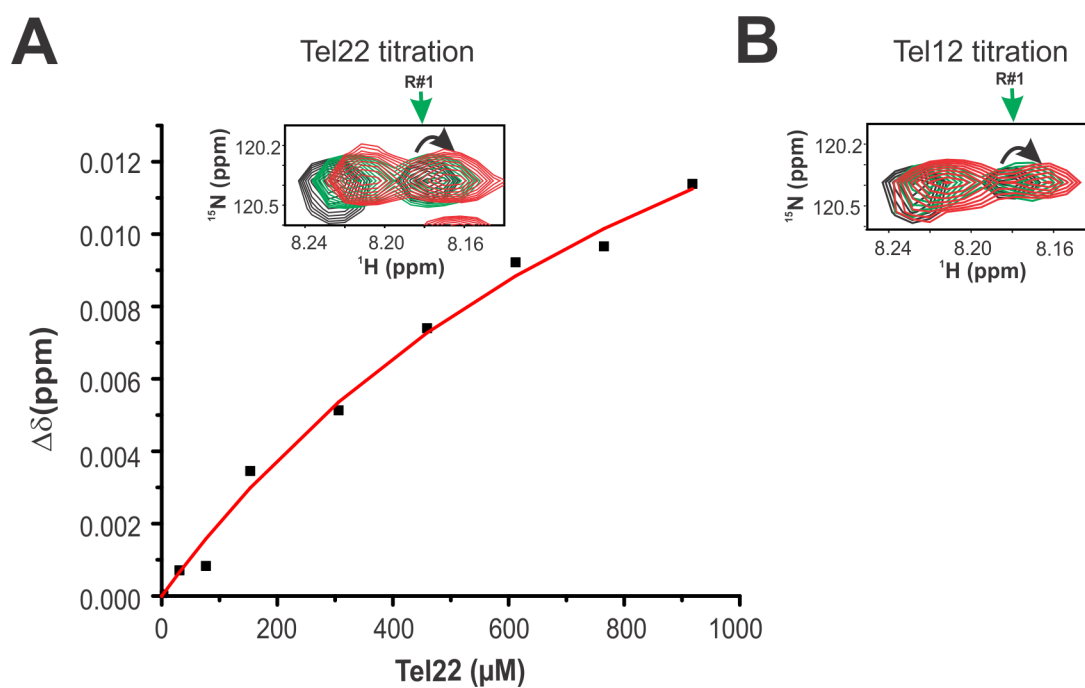

**SI Figure 6.** Arginine residue R#1 undergoes weak chemical shift perturbation upon binding to Tel22 (**A, inset**) and Tel12 (**B**). The CSPs observed versus added Tel22 DNA concentration for R#1 is plotted. An apparent individual fit  $K_d$  of  $913.13 \pm 33.92 \mu\text{M}$  was calculated from this fitting.

Figure S7

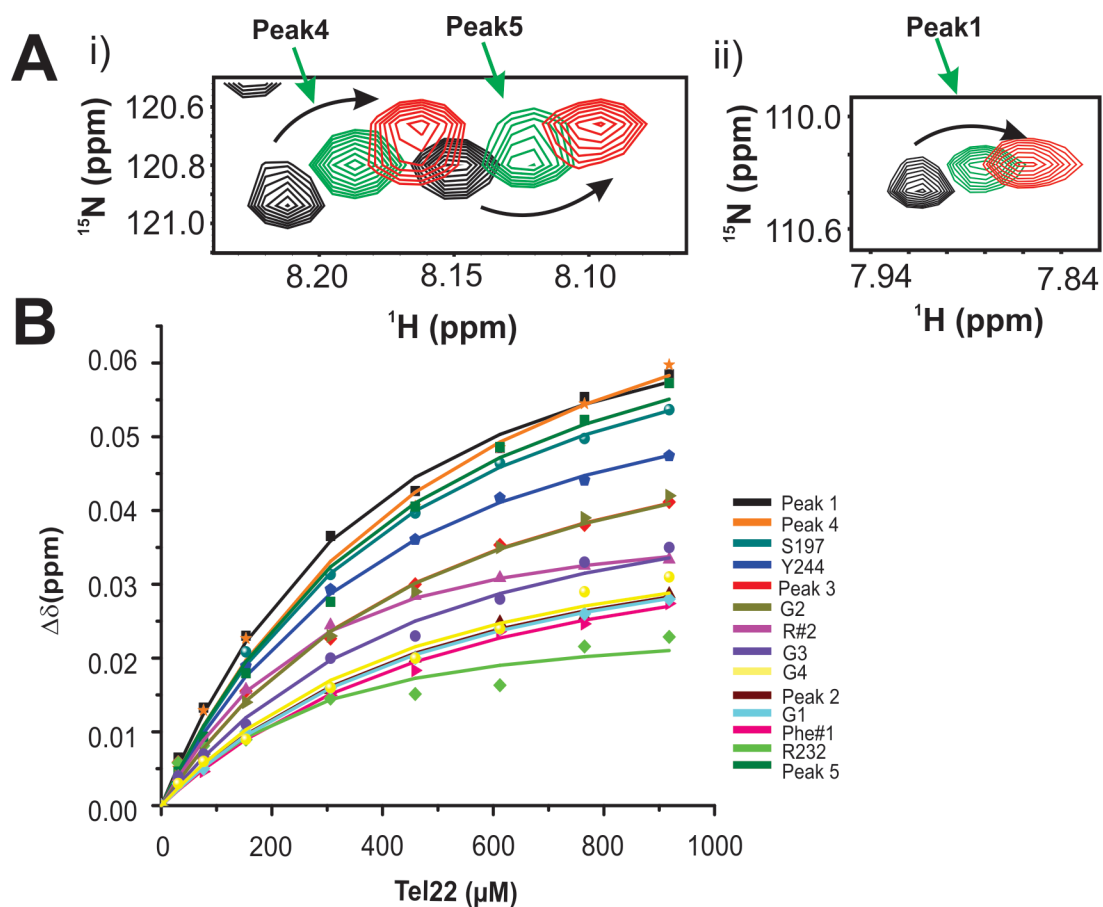

**SI Figure 7.** A subset of unassigned residues of the RGG-box that shows specific fast exchange chemical shift perturbations upon addition of Tel22DNA (**A (i) and (ii)**). (**B**) The CSPs of the residues used for the calculation of the global fit  $K_d$  are plotted as a function of added Tel22 DNA.



**Figure S8**

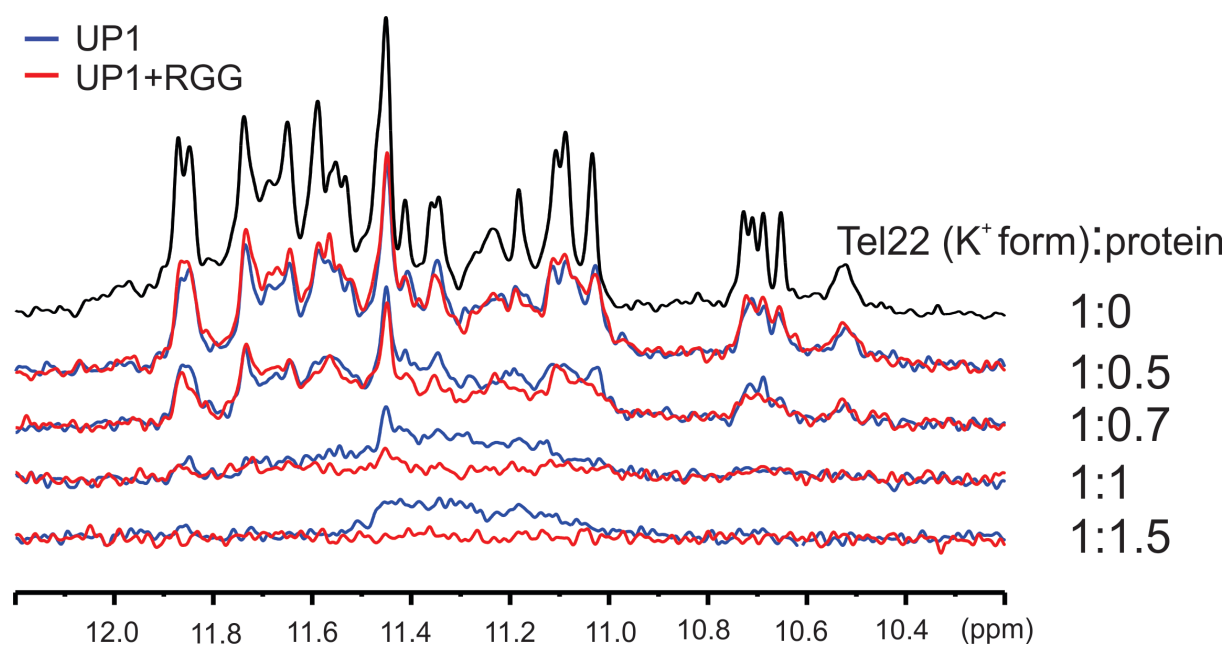

**SI Figure 8.** Titration of K<sup>+</sup> form of Tel22 with UP1 and UP1+RGG and monitored through NMR spectroscopy. Imino region of the 1D <sup>1</sup>H NMR spectra of K<sup>+</sup> form of Tel22 are shown at varying DNA to protein ratios. The DNA was titrated with increasing concentration of UP1 (blue) and UP1+RGG (red).

**Figure S9**

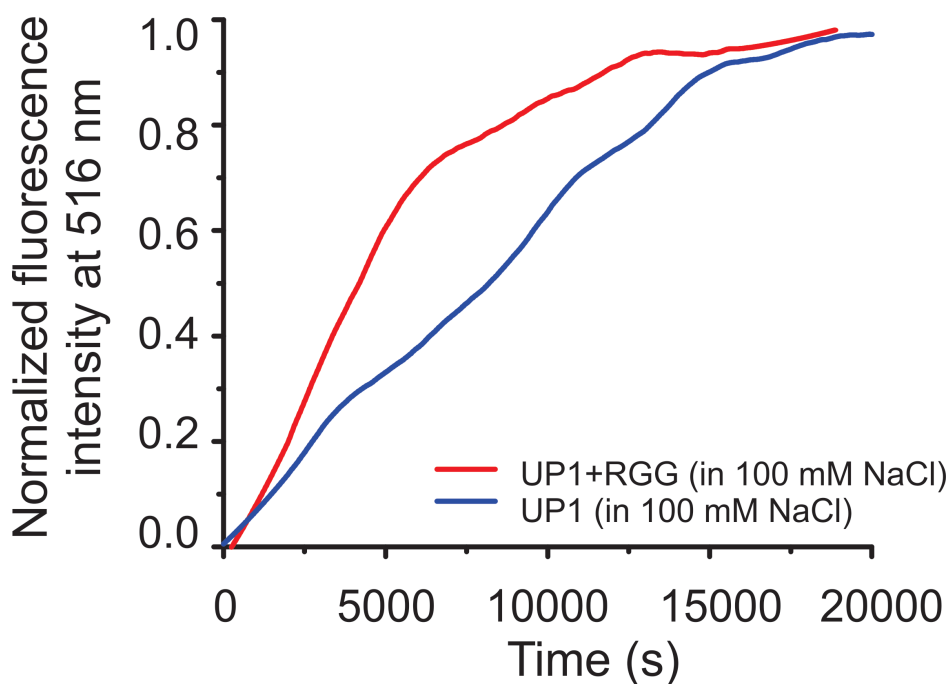

**SI Figure 9.** Unfolding of the 5'-FAM and 3'-TAMRA labeled Na<sup>+</sup> form of Tel22 (5'FAM-Tel22-TAMRA3') by UP1 (blue) and UP1+RGG (red) monitored by observing the emission of FAM at 516 nm. 5'FAM-Tel22-TAMRA3' DNA was mixed with 4 molar equivalent of UP1 or UP1+RGG and the emission spectra were recorded over a time period. UP1+RGG proceeds with an unfolding rate of  $k_{obs} = (1.93 \pm 0.01) \times 10^{-4} \text{ s}^{-1}$  and UP1 proceeds with an unfolding rate of  $k_{obs} = (0.63 \pm 0.01) \times 10^{-4} \text{ s}^{-1}$ , calculated from a single exponential fit of the data in Origin 9.0.

**Supplementary Table S1.** Individual fit dissociation constant ( $K_d$ ) values determined for residues of the RGG-box for its interaction with Tel22 G-quadruplex DNA based on the observed chemical shift perturbations.

| <b><i>Sl. No.</i></b>                                                               | <b><i>Residues</i></b> | <b><i>Individual fit <math>K_d</math> (in <math>\mu M</math>)</i></b> |
|-------------------------------------------------------------------------------------|------------------------|-----------------------------------------------------------------------|
| 1                                                                                   | Peak1                  | 263.89±9.19                                                           |
| 2                                                                                   | Peak2                  | 399.43±13.72                                                          |
| 3                                                                                   | Peak3                  | 375.07±15.49                                                          |
| 4                                                                                   | Peak4                  | 406.1±15.9                                                            |
| 5                                                                                   | Peak5                  | 349.5±19.7                                                            |
| 6                                                                                   | F#1                    | 432.86±15.56                                                          |
| 7                                                                                   | S197                   | 346.49±10                                                             |
| 8                                                                                   | R232                   | 171.81±34.36                                                          |
| 9                                                                                   | Y244                   | 305.18±12.926                                                         |
| 10                                                                                  | R#2                    | 150.76±7.31                                                           |
| 11                                                                                  | G#1                    | 404.96±7.81                                                           |
| 12                                                                                  | G#2                    | 377.23±9.89                                                           |
| 13                                                                                  | G#3                    | 348.67±18.08                                                          |
| 14                                                                                  | G#4                    | 342.60±23.44                                                          |
| <b>Global fit <math>K_d</math> for all these residue: 349±35 <math>\mu M</math></b> |                        |                                                                       |
